# Supplementary material for: Immune Characteristic Genes and Neutrophil Immune Transformation Studies in Severe COVID-19
Source: MDPI journal article supplement (doi:10.3390/microorganisms12040737), 2024-04-04
Supplement: s1 [file s1]

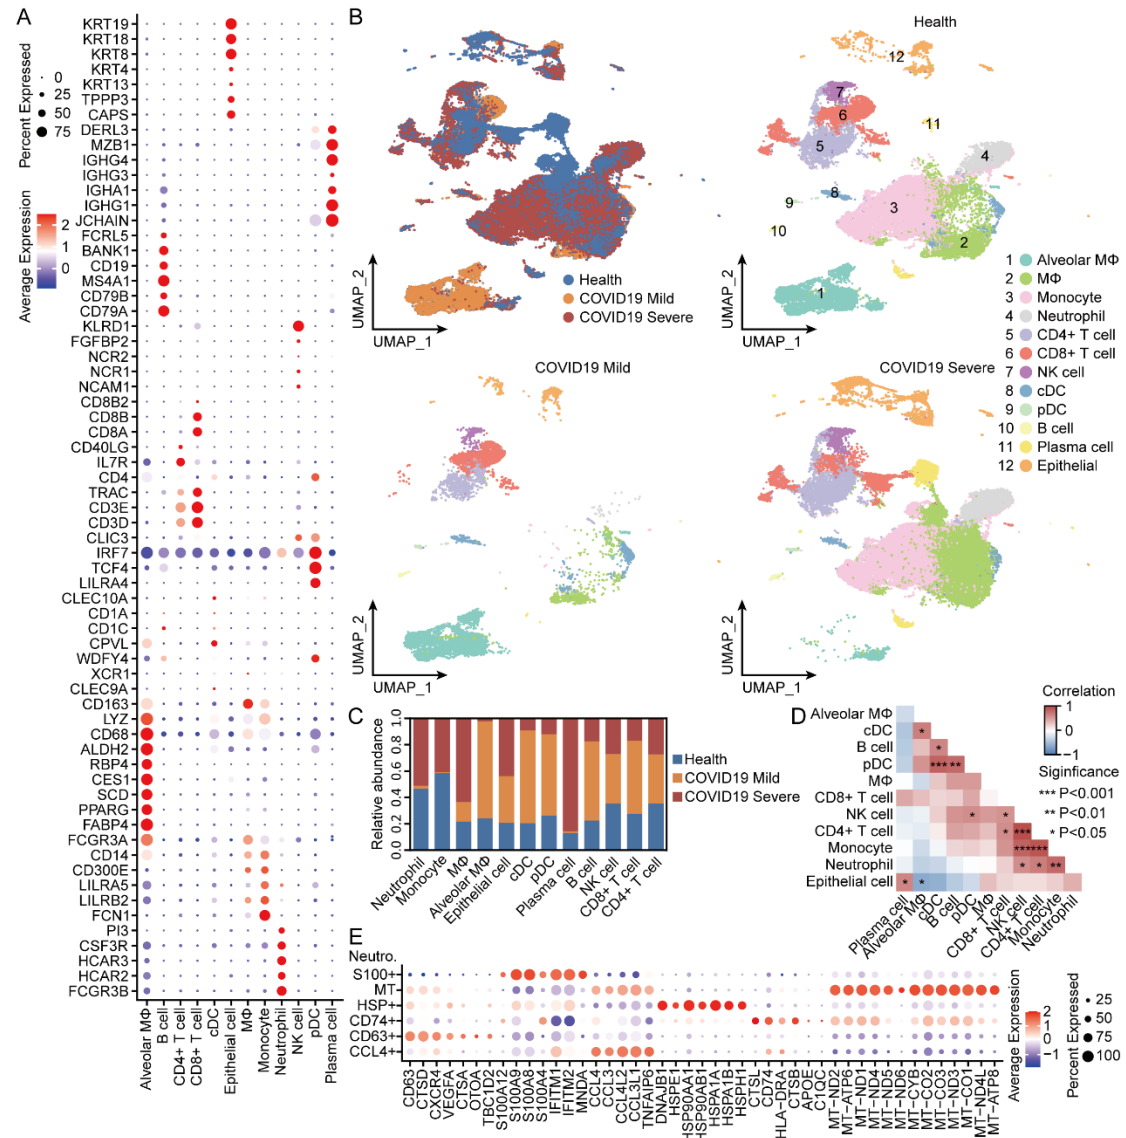

**Supplementary Figure S1. BAL scRNA-seq cell type definition and disease type distribution. (A)** Marker for major cell type definitions. **(B)** and **(C)** Distribution and proportion of different major cell types in different disease types. **(D)** Correlation heatmap of major cell types. **(E)** Marker for neutrophil subtype definitions. (\*  $P < 0.05$ , \*\*  $P < 0.01$ , \*\*\*  $P < 0.001$ ).
